1                   **Global phylogeography of marine *Synechococcus* in coastal areas**

2                   **reveals strikingly different communities than in the open ocean.**

3 Hugo Doré<sup>1,2</sup>, Jade Leconte<sup>1</sup>, Ulysse Guyet<sup>1,3</sup>, Solène Breton<sup>1</sup>, Gregory K. Farrant<sup>1</sup>, David  
4 Demory<sup>1,4</sup>, Morgane Ratin<sup>1</sup>, Mark Hoebeke<sup>5</sup>, Erwan Corre<sup>5</sup>, Frances D. Pitt<sup>6,7</sup>, Martin  
5 Ostrowski<sup>6,8</sup>, David J. Scanlan<sup>6</sup>, Frédéric Partensky<sup>1</sup>, Christophe Six<sup>1</sup> and Laurence Garczarek<sup>1</sup>

6 <sup>1</sup> Sorbonne Université, CNRS, UMR 7144 Adaptation and Diversity in the Marine Environment  
7 (AD2M), Station Biologique de Roscoff (SBR), Roscoff, France

8 <sup>5</sup> CNRS, FR 2424, ABiMS Platform, Station Biologique, CS 90074, Roscoff, France

9 <sup>6</sup> University of Warwick, School of Life Sciences, Coventry CV4 7AL, UK

10 <sup>2</sup> Current address: Department of Ecology, Evolution and Marine Biology; University of  
11 California, Santa Barbara, USA.

12 <sup>3</sup> Current address: Université de Bordeaux, CNRS, IBGC, UMR 5095, Bordeaux, 33000,  
13 France

14 <sup>4</sup> Current address: School of Biological Sciences, Georgia Institute of Technology, Atlanta, GA,  
15 USA

16 <sup>7</sup> Current address: Rosalind Franklin Laboratory, Leamington Spa, CV31 3RG, UK

17 <sup>8</sup> Current address: Climate Change Cluster, University of Technology, Broadway NSW 2007,  
18 Australia

19 **Corresponding author:** Laurence Garczarek ([laurence.garczarek@sb-roscoff.fr](mailto:laurence.garczarek@sb-roscoff.fr))

20 **Running Title:** Phylogeography of *Synechococcus* in coastal areas

21 **Key words:** marine cyanobacteria, *Synechococcus*, coastal areas, Ocean Sampling Day,  
22 temperature, niche partitioning, metagenomics.

23 **Competing Interests:** The authors declare no competing interests.

24

25 **Abstract**

26 Marine *Synechococcus* comprise a numerically and ecologically prominent phytoplankton  
27 group, playing a major role in both carbon cycling and trophic networks in all oceanic regions  
28 except in the polar oceans. Despite their high abundance in coastal areas, our knowledge of  
29 *Synechococcus* communities in these environments is based on only a few local studies. Here,  
30 we use the global metagenome dataset of the Ocean Sampling Day (June 21<sup>st</sup> 2014) to get a  
31 snapshot of the taxonomic composition of coastal *Synechococcus* communities worldwide, by  
32 recruitment on a reference database of 141 picocyanobacterial genomes, representative of the  
33 whole *Prochlorococcus*, *Synechococcus* and *Cyanobium* diversity. This allowed us to unravel  
34 drastic community shifts over small to medium scale gradients of environmental factors, in  
35 particular along European coasts. The combined analysis of the phylogeography of natural  
36 populations and the thermophysiological characterization of eight strains, representative of the  
37 four major *Synechococcus* lineages (clades I to IV), also brought novel insights about the  
38 differential niche partitioning of clades I and IV, which most often co-dominate the  
39 *Synechococcus* community in cold and temperate coastal areas. Altogether, this study tackles  
40 the main differences between open-ocean and coastal communities worldwide.

41

## 42 **Introduction**

43 Better assessment of the spatial and temporal variability of the genetic diversity, structure and  
44 dynamics of marine phytoplankton communities is critical to predicting their future evolution  
45 in environments whose physico-chemical properties are continuously altered by the ongoing  
46 global change. The marine picocyanobacteria *Prochlorococcus* and *Synechococcus*, together  
47 accounting for about 25% of ocean net primary production [1], are key members of  
48 phytoplankton communities and constitute particularly relevant models to tackle this issue.  
49 *Prochlorococcus* distribution is restricted to the 45°S–50°N latitudinal band preferentially  
50 thriving in oligotrophic areas, whilst *Synechococcus* is present in all marine environments from  
51 the equator to subpolar waters but reaches its highest abundances in nutrient-rich areas [2–8].  
52 The ability of these two genera to colonize a wide range of ecological niches is likely related to  
53 their large genetic diversity [9–13]. For *Prochlorococcus*, numerous environmental and  
54 laboratory studies have revealed the clear-cut niche partitioning between physiologically and  
55 genetically distinct ecotypes, with ‘phototypes’ [14], ‘thermotypes’ [3, 15, 16], and ‘nutritypes’  
56 [12, 17, 18], occupying distinct light, thermal and nutrient (+Fe/- Fe) niches. Besides  
57 *Prochlorococcus*, ‘Cluster 5’ *sensu* [19] also encompasses three major  
58 *Synechococcus/Cyanobium* lineages, called sub-clusters (SC) 5.1 through 5.3 [10, 20].  
59 Although a number of phylogenetic studies based on individual markers have considered SC  
60 5.2 and *Cyanobium* as being two distinct lineages (see e.g. [21–23]), the delineation is unclear  
61 and it was recently proposed, based on comparative genomics, that all members of these  
62 lineages should be gathered into a single group (SC 5.2) named ‘*Cyanobium*’, even though the  
63 level of genomic diversity within this group is quite large [20, 24, 25]. SC 5.2 gathers freshwater  
64 and halotolerant representatives and thus in the marine environment, members of this group are  
65 only found in significant abundance in river-influenced coastal waters, such as the Chesapeake  
66 Bay [21, 22, 26] or the Pearl River estuary [23, 27], and in low salinity areas such as the Baltic

67 Sea [28]. SC 5.3 was long thought to contain only obligatory marine representatives and was  
68 shown to account for a significant fraction of the *Synechococcus* community in some specific  
69 marine areas, including the Mediterranean Sea and northwestern Atlantic Ocean [12, 29–31].  
70 However, freshwater members of this group were recently discovered in the Tous reservoir  
71 (Spain) and were then found to be broadly distributed in temperate freshwater lakes [25, 32].  
72 Finally, SC 5.1, a lineage that rapidly diversified after the advent of the *Prochlorococcus*  
73 radiation [33, 34], is by far the most widespread and abundant *Synechococcus* lineage in the  
74 open ocean environment, e.g. representing more than 93% of total *Tara* Oceans metagenomic  
75 reads assigned to SC 5.1-5.3 [12]. From 10 to 15 phylogenetic clades have been defined within  
76 SC 5.1 depending on the phylogenetic marker [11, 29, 35] but studies of the global distribution  
77 patterns of *Synechococcus* populations in open ocean waters have shown that there are five  
78 major clades *in situ* (I, II, III, IV and CRD1), with clades I and IV co-dominating *Synechococcus*  
79 communities in cold and temperate, nutrient-rich areas, while clades II, III and CRD1  
80 preferentially thrive in warm waters [6, 12, 30, 31, 36]. Physiological measurement of  
81 temperature *preferenda* of strains belonging to clades I, II, III, IV and V isolated across different  
82 latitudes further confirmed the existence of warm (clades II, III, V) and cold (clades I and IV)  
83 ‘thermotypes’ [37–40]. Despite being phylogenetically distant, clades I and IV were further  
84 demonstrated to share a number of physiological adaptations to cold water, including a higher  
85 thermal sensitivity of phycobiliproteins [41], a similar change in membrane lipids [40, 42] and  
86 an increase of the photoprotection capacities using the orange carotenoid protein (OCP; [43]).  
87 Nutrients were also found to play a key role in structuring these populations, with clade II, the  
88 most abundant *Synechococcus* lineage in the ocean, dominating the *Synechococcus* community  
89 in N-poor areas, clade III in P-poor areas, while CRD1 is restricted to Fe-depleted waters [6,  
90 12, 31, 36].

91        Although the variability of picocyanobacterial communities and the main physico-  
92 chemical factors driving their composition are starting to be well understood in open ocean  
93 environments, the picture is much more fragmentary in coastal areas, because only a few coastal  
94 sites have been studied to date [21, 22, 24, 27, 44–46]. To get a more global view of the genetic  
95 diversity and biogeography of coastal populations of picocyanobacteria, we used metagenomic  
96 data from the Ocean Sampling Day (OSD) 2014 campaign [47], encompassing 157 coastal  
97 samples collected all over the world at the summer solstice, employing the same protocol for  
98 collecting DNA samples and associated metadata. Using a whole genome recruitment (WGR)  
99 approach, we assessed the genetic diversity and the clade-level composition of *Synechococcus*  
100 communities in OSD samples. Given the previously recognized role of temperature in  
101 structuring *Synechococcus* communities, we then analyzed the distribution patterns of the  
102 different lineages in light of previously published and new comparative thermophysiological  
103 data on *Synechococcus* strains representative of the most abundant clades in the field. The  
104 excellent spatial resolution achieved in northern Atlantic and Mediterranean coastal waters  
105 allowed us to observe several spatial community shifts and to enlighten the roles of temperature  
106 and salinity as key drivers of coastal *Synechococcus* community composition.

107

## 108 **Materials and methods**

### 109 Ocean Sampling Day metagenomics data

110 OSD 2014 is a global sampling campaign that took place on June 21<sup>st</sup>, 2014 and sampled 157  
111 stations worldwide for metagenomes (Dataset S1). The median distance to the nearest coast was  
112 0.29 nautical miles (average: 6.3 nautical miles). Details about sampling methods can be found  
113 at <https://repository.oceanbestpractices.org/handle/11329/616> [48]. Metagenomic data are  
114 available from the European Nucleotide Archive  
115 (<http://www.ebi.ac.uk/ena/data/view/PRJEB8682>) under the study accession number

116 PRJEB8682 (raw data) and from the European Bioinformatics Institute (EBI) Metagenomics  
117 portal under the project accession number ERP009703 (processed data). Data were downloaded  
118 from the EBI for 150 of the 157 stations for which a “processed reads without annotation” file  
119 was available, generated following the EBI analysis pipeline v2.0, available at  
120 <https://www.ebi.ac.uk/metagenomics/pipelines/2.0>. Briefly, Illumina MiSeq paired reads were  
121 merged using SeqPrep (<https://github.com/jstjohn/seqprep>) and trimmed for low quality ends,  
122 then sequences with more than 10% undetermined nucleotides were removed using  
123 Trimmomatic [49] before discarding reads shorter than 100 nucleotides. Contextual data  
124 collected at all OSD stations were retrieved from PANGAEA  
125 (<https://doi.pangaea.de/10.1594/PANGAEA.854419>; [50]) and those used in this study are  
126 listed in Dataset S1: only water temperature and salinity data were available in a sufficient  
127 number of stations to be used. A map of OSD stations used in this study is available as Fig. S1.

128

#### 129 Taxonomic assignment of metagenomic reads

130 BLASTN v2.2.28+ [51, 52] was used to align metagenomic reads against a database of 863  
131 complete genomes of aquatic bacteria (Dataset S2), gathering 141 genomes of marine  
132 picocyanobacteria and 722 outgroup genomes, the latter including 185 cyanobacterial genomes  
133 other than *Prochlorococcus* and marine *Synechococcus* listed in Cyanobase  
134 (<http://genome.microbedb.jp/cyanobase/>) as well as 537 genomes of other aquatic microbes  
135 downloaded from the proGenomes database (<http://progenomes.embl.de/representatives.cgi>).  
136 Only best-hit matches (option -max\_target\_seqs 1) with an e-value below  $10^{-3}$  (-evalue 0.001)  
137 were kept, and reads matching outgroup genomes were discarded. Based on BLASTN results,  
138 reads aligning over more than 90% of their length on a picocyanobacterial genome were  
139 extracted from initial read files, and a second BLASTN was run against a database containing  
140 only marine picocyanobacterial genomes with default parameters except for a lower limit on

141 percentage of identity of 30% (-perc\_identity 30), a filter on e-value of  $10^{-2}$  (-evalue 0.01) and  
142 by selecting the blastn algorithm (-task blastn). BLASTN results were then parsed using the  
143 Lowest Common Ancestor method [53]. For each read, BLAST matches with over 80% ID  
144 aligned over more than 90% of their length against a reference genome were kept if their  
145 BLAST score was within 5% of the best score. Then, the read was attributed to the lowest  
146 common ancestor of these matches (i.e., strain, clade, subcluster or genus). Counts of reads  
147 assigned to the strain or clade levels were ultimately aggregated by clade. Two additional  
148 categories were made for reads that could only be assigned to the level of *Synechococcus*  
149 subcluster 5.1 (SC 5.1 in Figures 1 and 3) or even *Synechococcus* genus (*Syn* in Figs 1 and 3).

150

#### 151 Analysis of picocyanobacterial community composition

152 In order to account for the potential variation in genome length among clades, read counts were  
153 divided by the average genome length within each clade. To minimize the noise in recruitment  
154 data, we then removed from the dataset stations with less than 600 recruited reads per million  
155 bp, corresponding to a genome coverage of ca. 16%, since reads are 242 bp long on average.  
156 Read counts at each station were further normalized by the total number of reads recruited at  
157 this station to assess relative abundances of taxa. The R packages *cluster* v1.14.4 [54] and *vegan*  
158 v2.2-1 [55] were used to cluster stations according to the Bray-Curtis distance. Figures were  
159 drawn in R v3.03 with package *ggplot2* v1.0.1 [56].

160

#### 161 Thermal *preferenda* of strains representative of the most abundant clades *in situ*

162 Two strains of each of the four most abundant *Synechococcus* clades in Fe-replete areas (clades  
163 I to IV) were selected from the Roscoff Culture Collection (Table 1; [http://roscoff-culture-  
164 collection.org/](http://roscoff-culture-collection.org/); [57]). Strains were grown in polystyrene flasks in PCR-S11 medium [58]  
165 supplemented with 1mM sodium nitrate. The seawater was reconstituted using Red Sea Salts

166 (Houston, TX, USA) and distilled water. Cultures of the eight strains were acclimated at least  
167 two weeks to a range of temperatures from 10°C to 33°C, within temperature-controlled  
168 chambers (Liebherr-Hausgeräte, Lienz, Austria) and continuous light was provided by  
169 green/white/blue LEDs (Alpheus, France) at an irradiance of 20  $\mu\text{mol photons m}^{-2} \text{s}^{-1}$ . After  
170 acclimation, cultures were split into three biological replicates for each strain, and sampled once  
171 or twice a day until the stationary phase was reached.

172 For cell density measurements, aliquots of cultures were preserved with 0.25%  
173 glutaraldehyde grade II (Sigma Aldrich, St Louis, MO, USA) and stored at -80°C until analysis  
174 [59]. Cell concentration was determined using a flow cytometer (FACSCanto II, Becton  
175 Dickinson, San Jose, CA, USA) with laser emission set at 488 nm, and using distilled water as  
176 sheath fluid.

177 To estimate the maximum population growth rates, we considered that *Synechococcus*  
178 exponential growth followed:

$$179 \quad \frac{dN}{dt} = \mu N$$

180 Where  $N$  is the cell abundances (in cell  $\text{mL}^{-1}$ ) and  $\mu$  is the maximum population growth  
181 rate (in  $\text{days}^{-1}$ ). We estimated  $\mu$  as the coefficient of the linear regression model performed on  
182 log-transform  $N(t)$  data during the exponential phase only.

183  
184 To overcome the fact that discrete experimental measurements have a limited resolution,  
185 we estimated the cardinal growth parameters for each strain using the Cardinal Temperature  
186 Model with Inflection (BR model; [60]). This model helps describe the growth response of  
187 acclimated phytoplankton strains to temperature using four parameters (Table 2): the optimal  
188 temperature for growth ( $T_{\text{opt}}$ ) at which the optimal growth rate ( $\mu_{\text{opt}}$ ) occurs, and the minimal  
189 and maximal temperatures for growth ( $T_{\text{min}}$  and  $T_{\text{max}}$ ) at which  $\mu = 0$ . Our data did not allow to  
190 constrain  $T_{\text{min}}$ , but this does not affect our estimation of other parameters.



191  
192  
193  
194  
195  
196  
197  
198  
199  
200  
201  
202  
203  
204  
205  
206  
207  
208  
209  
210  
211  
212  
213  
214  
215

## Results and Discussion

### Biogeography of coastal picocyanobacterial communities is influenced by seawater temperature

Most of the stations sampled during the OSD 2014 campaign [47] correspond to coastal areas with only 17 of 157 stations located over 11 nautical miles from the nearest coast. This dataset displays a particularly good spatial resolution in some regions of the world ocean and notably along European and Eastern United States coasts, while only a few of the sampled sites were located in the southern hemisphere (7 out of 157; Fig. S1). Here, we used the 150 metagenomes obtained in the framework of this campaign, altogether totaling 41 Gbp (168.7 million reads), to assess the relative abundance of *Synechococcus/Cyanobium* and *Prochlorococcus* clades using a Whole Genome Recruitment (WGR) approach against a reference genome database encompassing 141 genomes of marine picocyanobacteria as well as 722 cyanobacterial or other aquatic microbial genomes, used as outgroups (Fig. 1). *Prochlorococcus* was only abundant at a few stations, likely due to the coastal localization of the sampling sites, and was therefore not included in subsequent analyses. By contrast, *Synechococcus/Cyanobium*, known to outnumber *Prochlorococcus* in coastal areas [2, 8, 24, 61], was detected with sufficient coverage to perform reliable taxonomic assignment at the clade level in 102 out of the 150 OSD metagenomes. At most stations, the *Synechococcus/Cyanobium* community was dominated by one or two taxa among SC 5.1 clades I-IV, SC 5.2 or SC 5.3 (Fig. 1). Consistent with previous studies on the picocyanobacterial distribution in open ocean waters [7, 12, 15, 29, 31, 36], clades I and IV dominated at latitudes above 35°N (except in the Mediterranean Sea) and clade II at latitudes below 35°N, while clade III was almost exclusively present and often dominant in the Mediterranean Sea. It is also worth noting that the co-occurrence of clades I and IV at the few stations beyond 35°S in the Southern hemisphere mirrored the profiles obtained at the same

216 latitude in the Northern hemisphere, in agreement with previous observations in open ocean  
217 waters [12, 29, 31, 36] as well as with the low temperatures of isolation sites of clade I and IV  
218 strains [38].

219 In order to further explore the role of temperature on the differential latitudinal distribution  
220 of members of clades I to IV, we characterized the thermal *preferenda* of eight strains belonging  
221 to these clades (Fig 2). While several strains belonging to clade I were previously shown to  
222 withstand colder temperatures than their tropical clade II counterparts [38, 40, 43], growth  
223 optima and boundary limits for temperature were only available for one clade IV [40, 62] and  
224 two closely related clade III strains [37, 40, 63] and results were obtained in different light  
225 conditions, making them difficult to compare. Here, the direct comparison of clades I and IV  
226 strains grown in the same conditions showed quite similar thermal preferences. All tested strains  
227 displayed an optimal temperature for growth of about 24°C according to our model fit (Fig. 2  
228 and Table 2) and were all able to grow at the lowest tested temperature, 10°C, which is also the  
229 lowest temperature measured in the OSD 2014 stations where the *Synechococcus* community  
230 was analyzed. In comparison, clades II and III strains were not able to grow at temperatures of  
231 13°C and below, thus confirming with several strains that clades I and IV are cold thermotypes,  
232 whereas clades II and III are warm thermotypes. Altogether, these results support the idea that  
233 differences in thermophysiology at least partially explain the latitudinal distribution of these  
234 four clades.

235 Besides the abundance of clades I and IV, coastal *Synechococcus* communities also exhibited  
236 some other specificities as compared to open ocean populations, notably the very low relative  
237 abundance of clade CRD1, which was shown to be prevalent in large regions of the open ocean  
238 that are limited by iron availability [12, 31, 36], as well as the dominance of SC 5.2 in the  
239 brackish Baltic sea and at stations along the Atlantic coast of North America, often co-occurring  
240 with a low proportion of clade VIII. The latter observation is most likely due to the influence

241 of riverine inputs at these OSD stations, these taxa being known to occur in estuarine areas and  
242 to contain strains growing over a large range of salinity [10, 21, 35]. This hypothesis was further  
243 confirmed by clustering stations according to the relative abundance profiles of *Synechococcus*  
244 clades (Fig. 3), which clearly separated stations dominated by subcluster 5.2 and showed that  
245 they had a lower salinity than most other stations (cluster 5, Fig. 4B). Finally, clades V and VI,  
246 which were not distinguished from clade VII (and CRD1) in previous global surveys of  
247 *Synechococcus* distribution using the 16S rRNA marker gene, were found to be locally  
248 abundant in the dataset. While the V/VI/VII/CRD1 group was considered to be widely  
249 distributed in oceanic waters [4, 15, 29], our analysis reveals the potential preference for coastal  
250 areas of the closely related clades V and VI. This result is consistent with the previous local  
251 observations of the occurrence of clade V- and VI-related sequences at some coastal sites in the  
252 Adriatic Sea and the Pearl River Estuary [23, 64, 65].

253

### 254 **A progressive latitudinal shift in *Synechococcus/Cyanobium* communities along the coast** 255 **of Europe**

256 Besides the abovementioned specificities of coastal regions in terms of  
257 *Synechococcus/Cyanobium* community composition, we also observed changes in communities  
258 at a finer spatial scale along European coasts, where the sampling effort was the highest (see  
259 zoom in Fig. 1 and Fig. S1 for station numbers). While along the southern part of this latitudinal  
260 gradient from the Moroccan to French Atlantic coasts, *Synechococcus* communities were  
261 dominated by clade IV (e.g. OSD92), a progressive northward shift was observed towards the  
262 dominance of clade I in the North Sea (e.g., OSD164). Clustering of stations based on clade  
263 relative abundance indeed highlighted two groups of stations, the first one dominated by clade  
264 IV (cluster 3) and the second one by clade I (cluster 4; Fig. 3). Interestingly, clade I was found  
265 to dominate at stations that display a significantly lower salinity than those dominated by clades

266 II or III (clusters 1 and 2). These clade I-dominated stations also exhibited a significantly lower  
267 temperature (average 16.6°C, median 17°C) than all other clusters except cluster 3 dominated  
268 by clade IV (average temperature 19.1°C, median 19°C), the latter cluster of stations showing  
269 a significant difference in temperature only with cluster 2 (dominated by clade II). Thus, despite  
270 a clear latitudinal shift in the ratio of clade I to clade IV along the European coast, neither the  
271 difference in salinity nor the difference in seawater temperature seem to be sufficient to fully  
272 explain the observed changes.

273 While our thermal *preferenda* measurements confirmed that clades I and IV are both cold  
274 thermotypes, strains used for this study showed similar growth rates at cold temperatures (Fig  
275 2). This supports the observation that temperature alone does not explain their differential  
276 distribution, with the caveat that only two strains per clade were analyzed. As previously  
277 suggested for clade I in a number of environmental studies [5, 7, 23, 66, 67], it is possible that  
278 clade I and potentially clade IV are comprised of distinct genotypes exhibiting different lower  
279 temperature boundary limits and colonizing different thermal niches. A previous study indeed  
280 showed variability in the minimal growth temperature of clade I strains in relation to their  
281 latitude of isolation [38], and comparison of our experimental data with previous data acquired  
282 under the same light conditions [40] brings evidence of such variability for clade IV. Indeed,  
283 the two clade IV strains characterized here were sampled at high latitude (Table 1) and show a  
284 higher tolerance to cold temperatures than BL107, another clade IV strain isolated in the  
285 Mediterranean Sea [40]. Thus, the ecological differences between clades I and IV are most  
286 probably difficult to identify due to underlying differences between genotypes at a finer  
287 taxonomic level, and a higher taxonomic resolution would be necessary if one wanted to  
288 observe a significant effect of temperature on the distribution of populations of these clades.  
289 Alternatively, it is possible that other parameters or combinations of parameters varying with  
290 latitude need to be considered to explain the shift in clades I and IV dominance. Notably, an

291 interaction between light and temperature on phytoplankton physiology has been described in  
292 a number of species [68], and these two parameters vary greatly with latitude.

293 Several other potential reasons have been previously evoked to explain the co-occurrence  
294 of clades I and IV and variations in their relative abundance *in situ*, including differences in  
295 their metal concentration requirements [31, 44] and transport and mixing of populations by  
296 advection. The latter hypothesis was notably suggested for *Synechococcus* populations from  
297 north-west of the Svalbard island (above 79°N), where the Gulf Stream current was proposed  
298 to be the source of clade IV populations in summer [5] and from the Korean Sea where the  
299 warm, oligotrophic Kuroshio Current was suggested to be responsible for the co-occurrence of  
300 clades I, II and IV populations [69]. Interestingly the only OSD sampling site close to Japan  
301 (OSD124, Fig. S1) was described by its sampler as a site where oceanic and coastal waters are  
302 sporadically interchanged, which could explain the unexpected profile of this station where  
303 clades I and II co-dominate (Fig. 1). Finally, other studies also suggested that clade I could be  
304 a more coastal and opportunistic clade than clade IV [10, 44], but this hypothesis does not seem  
305 to be confirmed by the present study since many coastal stations (cluster 3) are actually  
306 dominated by clade IV.

307

### 308 **Local changes in *Synechococcus* communities in the Mediterranean Sea**

309 Stations sampled in the Mediterranean Sea fell into several clusters based on their composition  
310 in *Synechococcus*/*Cyanobium* lineages. Most stations belonged to cluster 1, dominated by clade  
311 III with a low relative abundance of clades VI, WPC1 and SC 5.3 (Fig. 3). This clade  
312 composition is quite similar to that previously described [12] for open waters of the  
313 Mediterranean Sea, which was suggested to be related to specific features of this semi-enclosed  
314 sea and notably to its low phosphate concentration [12, 15, 29], a parameter that was not  
315 available in the OSD dataset. Most of the stations of the Adriatic Sea formed a distinct cluster

316 (cluster 7), where the same clades were present but in different proportions, clade VI and SC  
317 5.3 taking over clade III. Finally, stations OSD34 and OSD90, located on the Egyptian and  
318 Greek coasts, respectively, the only stations of the OSD dataset comprising a high proportion  
319 of clade V or VIII, formed a cluster on their own (cluster 6 and 9). While these four clusters  
320 (clusters 1, 6, 7 and 9) are specific to the Mediterranean Sea, it is worth noting that two stations  
321 at the easternmost end of the Mediterranean Sea (OSD123 and OSD132, Figs. 3 and S1) fell  
322 into cluster 2, dominated by clade II, and showed a clade composition very similar to the  
323 samples collected in the Red Sea (OSD52 and OSD53). This suggests that Israeli coastal areas  
324 are strongly influenced by waters entering the Mediterranean Sea via the Suez Canal, consistent  
325 with previous findings for *Synechococcus*, *Prochlorococcus* as well as for larger organisms [70,  
326 71].

327 Interestingly, the three specific clusters identified in the Mediterranean Sea displayed  
328 different temperature and salinity characteristics (Fig. 4A-B). The salinity range of stations in  
329 cluster 1 (dominated by clade III) was narrow (average salinity 37.90 psu, median 37.98 psu)  
330 and significantly higher than that of cluster 7 (dominated by clade VI and SC 5.3, average  
331 salinity 31.43 psu, median 32.77 psu), suggesting that clade VI and SC 5.3 are able to cope with  
332 lower salinities. Consistently, SC 5.3 was recently found to encompass members colonizing  
333 freshwater lakes [25, 32], while in the marine environment, this subcluster was reported both  
334 in strictly marine waters [12, 30] and in low salinity waters [72]. Our study also brings new  
335 insights into the ecological niche occupied by clade VI, whose distribution was so far poorly  
336 known [29], and that appears to be restricted to coastal regions of intermediate salinity. All  
337 stations of the Adriatic Sea comprising cluster 6 were indeed sampled in the northwestern part  
338 of this area, where the influence of the Po River plume may be important [73]. This distribution  
339 is consistent with previous observations of the closely-related and often co-occurring clade V  
340 in low salinity surface waters of the Adriatic Sea [64] and of both clades V and VI in the Pearl

341 River Estuary [74]. Laboratory experiments also showed that representative strains of these two  
342 clades can tolerate salinities as low as 15 psu [75]. Still, we cannot exclude that besides low  
343 salinity, other local specificities linked to riverine input might also explain the predominance  
344 of SC 5.3 and clade VI in coastal areas of the Adriatic Sea.

345 A significant difference in water temperature was also found between cluster 1, dominated  
346 by clade III (average temperature 21.5°C, median 20.8°C) and cluster 2, dominated by clade II  
347 (average 26.5°C, median 27.1°C). This suggests that the shift observed at the easternmost part  
348 of the Mediterranean Sea from a dominance of clade III to a local dominance of clade II (stations  
349 OSD123 and OSD132, Figs. 1 and S1) might be related to a difference in water temperature.  
350 Interestingly, in contrast to clades I and IV that often co-occur, clades II and III seem to be  
351 nearly mutually exclusive, at least in the Mediterranean Sea, and the temperature limit above  
352 which clade II dominates seems to lie around 25°C (Fig. 3). In our experimental comparison of  
353 thermal *preferenda*, this corresponds to the temperature at which growth rates of clade II strains  
354 become higher than that of clade III strains, resulting in a higher optimal temperature of clade  
355 II compared to clade III strains (Table 2). Altogether, temperature and salinity appear as major  
356 factors driving the composition of *Synechococcus/Cyanobium* communities in coastal waters  
357 of the Mediterranean Sea, although other biotic and abiotic factors are most likely involved,  
358 notably the availability of phosphorus, a key limiting nutrient in this area [76].

359

## 360 **Conclusion**

361 The OSD dataset is unique, not only by providing an instantaneous snapshot of the microbial  
362 community composition but also because, by focusing on coastal areas, it nicely complements  
363 other recent global ocean surveys performed in the open ocean [6, 12, 31, 36, 77, 78]. In  
364 particular, the good spatial resolution of the sampling performed along the European coasts is  
365 well-adapted to observe shifts in communities and delineate their boundaries. Despite the fact

366 that only a few physico-chemical parameters were collected, this dataset allowed us to  
367 considerably improve our knowledge of the distribution of *Synechococcus/Cyanobium* lineages  
368 in coastal areas, to gain insights into the realized environmental niches of the main ones,  
369 including some that were previously poorly known such as clade VI, as well as to reinforce  
370 hypotheses about thermal niche differentiation that were supported by laboratory experiments  
371 on a set of representative strains. A continued effort towards global instantaneous surveys of  
372 microbial diversity in coastal areas over the long term and at different seasons would be  
373 invaluable to monitor the evolution of microbial communities in relation to global change.

374

### 375 **Acknowledgements**

376 We thank the OSD Consortium for sampling, sequencing and making freely available the data  
377 analyzed in this paper as well as the Roscoff Culture Collection ([http://roscoff-culture-](http://roscoff-culture-collection.org/)  
378 [collection.org/](http://roscoff-culture-collection.org/)) for providing *Synechococcus* strains used in this study. Financial support for  
379 the OSD program was provided by the European Union program MicroB3 (UE-contract-  
380 287589) and authors were supported by the French “Agence Nationale de la Recherche”  
381 programs SAMOSA (ANR-13-ADAP-0010) and CINNAMON (ANR-17-CE02-0014-01) as  
382 well as the European program Assemble Plus (H2020-INFRAIA-1-2016-2017; grant no.  
383 730984). DJS received funding from the European Research Council (ERC) under the European  
384 Union’s Horizon 2020 research and innovation programme (grant agreement No 883551).

385

### 386 **Competing Interests**

387 The authors declare no competing interests.

388



## 389 **References**

- 390 1. Flombaum P, Gallegos JL, Gordillo R a, Rincón J, Zabala LL, Jiao N, et al. Present and  
391 future global distributions of the marine Cyanobacteria *Prochlorococcus* and  
392 *Synechococcus*. *Proc Natl Acad Sci U S A* 2013; **110**: 9824–9.
- 393 2. Partensky F, Blanchot J, Vaultot D. Differential distribution and ecology of  
394 *Prochlorococcus* and *Synechococcus* in oceanic waters: a review. *Bull Inst Océan* 1999;  
395 **19**: 457–475.
- 396 3. Johnson ZI, Zinser ER, Coe A, McNulty NP, Woodward EMS, Chisholm SW. Niche  
397 partitioning among *Prochlorococcus* ecotypes along ocean-scale environmental  
398 gradients. *Science* 2006; **311**: 1737–1740.
- 399 4. Scanlan DJ. Marine picocyanobacteria. In: Whitton BA (ed). *Ecology of Cyanobacteria*  
400 *II: Their Diversity in Space and Time*. 2012. Springer Netherlands, Dordrecht, pp 503–  
401 533.
- 402 5. Paulsen ML, Doré H, Garczarek L, Seuthe L, Müller O, Sandaa R-A, et al.  
403 *Synechococcus* in the Atlantic Gateway to the Arctic Ocean. *Front Mar Sci* 2016; **3**: 191.
- 404 6. Kent AG, Baer SE, Mouginit C, Huang JS, Larkin AA, Lomas MW, et al. Parallel  
405 phylogeography of *Prochlorococcus* and *Synechococcus*. *ISME J* 2019; **13**: 430–441.
- 406 7. Xia X, Cheung S, Endo H, Suzuki K, Liu H. Latitudinal and vertical variation of  
407 *Synechococcus* assemblage composition along 170° W transect from the south Pacific to  
408 the Arctic Ocean. *Microb Ecol* 2019; **77**: 333–342.
- 409 8. Visintini N, Martiny AC, Flombaum P. *Prochlorococcus*, *Synechococcus*, and  
410 picoeukaryotic phytoplankton abundances in the global ocean. *Limnol Oceanogr Lett*  
411 2021; **6**: 207–215.

- 412 9. Rocap G, Larimer FW, Lamerdin J, Malfatti S, Chain P, Ahlgren NA, et al. Genome  
413 divergence in two *Prochlorococcus* ecotypes reflects oceanic niche differentiation.  
414 *Nature* 2003; **424**: 1042–1047.
- 415 10. Dufresne A, Ostrowski M, Scanlan DJ, Garczarek L, Mazard S, Palenik BP, et al.  
416 Unraveling the genomic mosaic of a ubiquitous genus of marine cyanobacteria. *Genome*  
417 *Biol* 2008; **9**: R90–R90.
- 418 11. Mazard S, Ostrowski M, Partensky F, Scanlan DJ. Multi-locus sequence analysis,  
419 taxonomic resolution and biogeography of marine *Synechococcus*. *Environ Microbiol*  
420 2012; **14**: 372–86.
- 421 12. Farrant GK, Doré H, Cornejo-Castillo FM, Partensky F, Ratin M, Ostrowski M, et al.  
422 Delineating ecologically significant taxonomic units from global patterns of marine  
423 picocyanobacteria. *Proc Natl Acad Sci* 2016; **113**: E3365–E3374.
- 424 13. Garcia CA, Hagstrom GI, Larkin AA, Ustick LJ, Levin SA, Lomas MW, et al. Linking  
425 regional shifts in microbial genome adaptation with surface ocean biogeochemistry.  
426 *Philos Trans R Soc B Biol Sci* 2020; **375**: 20190254.
- 427 14. Moore LR, Rocap G, Chisholm SW. Physiology and molecular phylogeny of coexisting  
428 *Prochlorococcus* ecotypes. *Nature* 1998; **393**: 464–467.
- 429 15. Mella-Flores D, Mazard S, Humily F, Partensky F, Mahé F, Bariat L, et al. Is the  
430 distribution of *Prochlorococcus* and *Synechococcus* ecotypes in the Mediterranean Sea  
431 affected by global warming? *Biogeosciences* 2011; **8**: 2785–2804.
- 432 16. Chandler JW, Lin Y, Gainer PJ, Post AF, Johnson ZI, Zinser ER. Variable but persistent  
433 coexistence of *Prochlorococcus* ecotypes along temperature gradients in the ocean's  
434 surface mixed layer. *Environ Microbiol Rep* 2016; **8**: 272–284.

- 435 17. Rusch DB, Martiny AC, Dupont CL, Halpern AL, Venter JC. Characterization of  
436 *Prochlorococcus* clades from iron-depleted oceanic regions. *Proc Natl Acad Sci U S A*  
437 2010; **107**: 16184–16189.
- 438 18. Malmstrom RR, Rodrigue S, Huang KH, Kelly L, Kern SE, Thompson A, et al. Ecology  
439 of uncultured *Prochlorococcus* clades revealed through single-cell genomics and  
440 biogeographic analysis. *ISME J* 2013; **7**: 184–198.
- 441 19. Herdman M, Castenholz RW, Waterbury JB, Rippka R. Form-genus XIII.  
442 *Synechococcus*. In: Boone D, Castenholz R (eds). *Bergey's Manual of Systematics of*  
443 *Archaea and Bacteria Volume 1*, 2nd Ed. 2001. Springer-Verlag, New York, pp 508–  
444 512.
- 445 20. Doré H, Farrant GK, Guyet U, Haguait J, Humily F, Ratin M, et al. Evolutionary  
446 mechanisms of long-term genome diversification associated with niche partitioning in  
447 marine picocyanobacteria. *Front Microbiol* 2020; **11**: 567431.
- 448 21. Chen F, Wang K, Kan J, Suzuki MT, Wommack KE. Diverse and unique  
449 picocyanobacteria in Chesapeake Bay, revealed by 16S-23S rRNA internal transcribed  
450 spacer sequences. *Appl Environ Microbiol* 2006; **72**: 2239–2243.
- 451 22. Cai H, Wang K, Huang S, Jiao N, Chen F. Distinct patterns of picocyanobacterial  
452 communities in winter and summer in the Chesapeake Bay. *Appl Environ Microbiol*  
453 2010; **76**: 2955–2960.
- 454 23. Xia X, Partensky F, Garczarek L, Suzuki K, Guo C, Cheung SY, et al. Phylogeography  
455 and pigment type diversity of *Synechococcus* cyanobacteria in surface waters of the  
456 northwestern Pacific Ocean. *Environ Microbiol* 2017; **19**: 142–158.
- 457 24. Hunter-Cevera KR, Post AF, Peacock EE, Sosik HM. Diversity of *Synechococcus* at the  
458 Martha's Vineyard coastal observatory: Insights from culture isolations, clone libraries,  
459 and flow cytometry. *Microb Ecol* 2016; **71**: 276–289.

- 460 25. Cabello-Yeves PJ, Picazo A, Camacho A, Callieri C, Rosselli R, Roda-Garcia JJ, et al.  
461 Ecological and genomic features of two widespread freshwater picocyanobacteria.  
462 *Environ Microbiol* 2018; **20**: 3757–3771.
- 463 26. Chen F, Wang K, Kan J, Bachoon DS, Lu J, Lau S, et al. Phylogenetic diversity of  
464 *Synechococcus* in the Chesapeake Bay revealed by ribulose-1,5-bisphosphate  
465 carboxylase-oxygenase (RuBisCO) large subunit gene (*rbcL*) sequences. *Aquat Microb*  
466 *Ecol* 2004; **36**: 153–164.
- 467 27. Xia X, Vidyarthna NK, Palenik B, Lee P, Liu H. Comparison of the seasonal variations  
468 of *Synechococcus* assemblage structures in estuarine waters and coastal waters of Hong  
469 Kong. *Appl Environ Microbiol* 2015; **81**: 7644–7655.
- 470 28. Haverkamp T, Acinas SG, Doeleman M, Stomp M, Huisman J, Stal LJ. Diversity and  
471 phylogeny of Baltic Sea picocyanobacteria inferred from their ITS and phycobiliprotein  
472 operons. *Environ Microbiol* 2008; **10**: 174–188.
- 473 29. Zwirgmaier K, Jardillier L, Ostrowski M, Mazard S, Garczarek L, Vaultot D, et al.  
474 Global phylogeography of marine *Synechococcus* and *Prochlorococcus* reveals a distinct  
475 partitioning of lineages among oceanic biomes. *Environ Microbiol* 2008; **10**: 147–161.
- 476 30. Huang S, Wilhelm SW, Harvey HR, Taylor K, Jiao N, Chen F. Novel lineages of  
477 *Prochlorococcus* and *Synechococcus* in the global oceans. *ISME J* 2012; **6**: 285–97.
- 478 31. Sohm JA, Ahlgren NA, Thomson ZJ, Williams C, Moffett JW, Saito MA, et al. Co-  
479 occurring *Synechococcus* ecotypes occupy four major oceanic regimes defined by  
480 temperature, macronutrients and iron. *ISME J* 2015; **10**: 1–13.
- 481 32. Cabello-Yeves PJ, Haro-Moreno JM, Martin-Cuadrado AB, Ghai R, Picazo A, Camacho  
482 A, et al. Novel *Synechococcus* genomes reconstructed from freshwater reservoirs. *Front*  
483 *Microbiol* 2017; **8**: 1–13.

- 484 33. Urbach E, Robertson DL, Chisholm SW. Multiple evolutionary origins of  
485 prochlorophytes within the cyanobacterial radiation. *Nature* 1992; **355**: 267–270.
- 486 34. Sánchez-Baracaldo P. Origin of marine planktonic cyanobacteria. *Sci Rep* 2015; **5**:  
487 17418.
- 488 35. Fuller NJ, Marie D, Partensky F, Vaultot D, Post AF, Scanlan DJ. Clade-specific 16S  
489 ribosomal DNA oligonucleotides reveal the predominance of a single marine  
490 *Synechococcus* clade throughout a stratified water column in the Red Sea. *Appl Environ*  
491 *Microbiol* 2003; **69**: 2430–2443.
- 492 36. Ahlgren NA, Belisle BS, Lee MD. Genomic mosaicism underlies the adaptation of  
493 marine *Synechococcus* ecotypes to distinct oceanic iron niches. *Environ Microbiol* 2020;  
494 **22**: 1801–1815.
- 495 37. Mackey KRM, Paytan A, Caldeira K, Grossman AR, Moran D, McIlvin M, et al. Effect  
496 of temperature on photosynthesis and growth in marine *Synechococcus* spp. *Plant*  
497 *Physiol* 2013; **163**: 815–829.
- 498 38. Pittera J, Humily F, Thorel M, Grulois D, Garczarek L, Six C. Connecting thermal  
499 physiology and latitudinal niche partitioning in marine *Synechococcus*. *ISME J* 2014; **8**:  
500 1221–1236.
- 501 39. Varkey D, Mazard S, Ostrowski M, Tetu SG, Haynes P, Paulsen IT. Effects of low  
502 temperature on tropical and temperate isolates of marine *Synechococcus*. *ISME J* 2016;  
503 **10**: 1252–1263.
- 504 40. Breton S, Jouhet J, Guyet U, Gros V, Pittera J, Demory D, et al. Unveiling membrane  
505 thermoregulation strategies in marine picocyanobacteria. *New Phytol* 2020; **225**: 2396–  
506 2410.
- 507 41. Pittera J, Partensky F, Six C. Adaptive thermostability of light-harvesting complexes in  
508 marine picocyanobacteria. *ISME J* 2017; **11**: 112–124.

- 509 42. Pittera J, Jouhet J, Breton S, Garczarek L, Partensky F, Maréchal É, et al.  
510 Thermoacclimation and genome adaptation of the membrane lipidome in marine  
511 *Synechococcus*. *Environ Microbiol* 2018; **20**: 612–631.
- 512 43. Six C, Ratin M, Marie D, Corre E. Marine *Synechococcus* picocyanobacteria: Light  
513 utilization across latitudes. *Proc Natl Acad Sci U S A* 2021; **118**: e2111300118.
- 514 44. Tai V, Palenik B. Temporal variation of *Synechococcus* clades at a coastal Pacific Ocean  
515 monitoring site. *ISME J* 2009; **3**: 903–915.
- 516 45. Hunter-Cevera KR, Neubert MG, Solow AR, Olson RJ, Shalapyonok A, Sosik HM. Diel  
517 size distributions reveal seasonal growth dynamics of a coastal phytoplankter. *Proc Natl*  
518 *Acad Sci* 2014; **111**: 9852–9857.
- 519 46. Xia X, Liu H, Choi D, Noh JH. Variation of *Synechococcus* pigment genetic diversity  
520 along two turbidity gradients in the China seas. *Microb Ecol* 2018; **75**: 10–21.
- 521 47. Kopf A, Bicak M, Kottmann R, Schnetzer J, Kostadinov I, Lehmann K, et al. The ocean  
522 sampling day consortium. *GigaScience* 2015; **4**: 27–27.
- 523 48. ten Hoopen P, Cochrane G, MicroB3 Consortium. Ocean Sampling Day Handbook.  
524 2016. <https://repository.oceanbestpractices.org/handle/11329/616>
- 525 49. Bolger AM, Lohse M, Usadel B. Trimmomatic: A flexible trimmer for Illumina  
526 sequence data. *Bioinformatics* 2014; **30**: 2114–2120.
- 527 50. Ocean Sampling Day Consortium P. Registry of samples and environmental context  
528 from the Ocean Sampling Day 2014. 2015. PANGAEA.  
529 [http://datadiscoverystudio.org/geoportal/rest/metadata/item/6146e7124e4d49e5b6f26751](http://datadiscoverystudio.org/geoportal/rest/metadata/item/6146e7124e4d49e5b6f26751a90a6e33/html)  
530 [a90a6e33/html](http://datadiscoverystudio.org/geoportal/rest/metadata/item/6146e7124e4d49e5b6f26751a90a6e33/html)
- 531 51. Altschul SF, Gish W, Miller W, Myers EW, Lipman DJ. Basic local alignment search  
532 tool. *J Mol Biol* 1990; **215**: 403–410.

- 533 52. Camacho C, Coulouris G, Avagyan V, Ma N, Papadopoulos J, Bealer K, et al. BLAST+:  
534 architecture and applications. *BMC Bioinformatics* 2009; **10**: 421–421.
- 535 53. Huson DH, Auch AF, Qi J, Schuster SC. MEGAN analysis of metagenomic data.  
536 *Genome Res* 2007; **17**: 377–386.
- 537 54. Maechler M, Peter R, Struyf A, Hubert M, Hornik K. Cluster: Cluster analysis basics  
538 and extensions. 2013.
- 539 55. Oksanen J, Blanchet FG, Kindt R, Legendre P, Minchin PR, O’Hara RB, et al. vegan:  
540 Community Ecology Package. 2015.
- 541 56. Wickham H. ggplot2: elegant graphics for data analysis. 2009. Springer New York.
- 542 57. Vaultot D, Le Gall F, Marie D, Guillou L, Partensky F. The Roscoff Culture Collection  
543 (RCC): a collection dedicated to marine picoplankton. *Nova Hedwig* 2004; **79**: 49–70.
- 544 58. Rippka R, Coursin T, Hess W, Lichtlé C, Scanlan DJ, Palinska KA, et al.  
545 *Prochlorococcus marinus* Chisholm *et al.* 1992 *subsp. pastoris subsp. nov.* strain PCC  
546 9511, the first axenic chlorophyll *a2/b2*-containing cyanobacterium (Oxyphotobacteria).  
547 *Int J Syst Evol Microbiol* 2000; **50**: 1833–1847.
- 548 59. Marie D, Brussaard CPD, Partensky F, Vaultot D. Flow cytometric analysis of  
549 phytoplankton, bacteria and viruses. In: Robinson JP (ed). *Current Protocols in*  
550 *Cytometry*. 1999. John Wiley & Sons, New York, pp 1–15.
- 551 60. Bernard O, Rémond B. Validation of a simple model accounting for light and  
552 temperature effect on microalgal growth. *Bioresour Technol* 2012; **123**: 520–527.
- 553 61. Olson RJ, Chisholm SW, Zettler ER, Armbrust EV. Pigment, size and distribution of  
554 *Synechococcus* in the North Atlantic and Pacific oceans. *Limnol Oceanogr* 1990; **35**: 45–  
555 58.

- 556 62. Varkey D, Mazard S, Ostrowski M, Tetu SG, Haynes P, Paulsen IT. Effects of low  
557 temperature on tropical and temperate isolates of marine *Synechococcus*. *ISME J* 2016;  
558 **10**: 1252–1263.
- 559 63. Moore L, Goericke R, Chisholm S. Comparative physiology of *Synechococcus* and  
560 *Prochlorococcus*: influence of light and temperature on growth, pigments, fluorescence  
561 and absorptive properties. *Mar Ecol Prog Ser* 1995; **116**: 259–275.
- 562 64. Šilović T, Balagué V, Orlić S, Pedrós-Alió C. Picoplankton seasonal variation and  
563 community structure in the northeast Adriatic coastal zone. *FEMS Microbiol Ecol* 2012;  
564 **82**: 678–691.
- 565 65. Babic I, Petric I, Bosak S, Mihanovic H, Dupcic Radic I, Ljubescic Z. Distribution and  
566 diversity of marine picocyanobacteria community: Targeting of *Prochlorococcus*  
567 ecotypes in winter conditions (southern Adriatic Sea). *Mar Genomics* 2017; **36**: 3–11.
- 568 66. Tai V, Burton R, Palenik B. Temporal and spatial distributions of marine *Synechococcus*  
569 in the Southern California Bight assessed by hybridization to bead-arrays. *Mar Ecol*  
570 *Prog Ser* 2011; **426**: 133–147.
- 571 67. Choi DH, Noh JH, An SM, Choi YR, Lee H, Ra K, et al. Spatial distribution of cold-  
572 adapted *Synechococcus* during spring in seas adjacent to Korea. *Algae* 2016; **31**: 231–  
573 241.
- 574 68. Edwards KF, Thomas MK, Klausmeier CA, Litchman E. Phytoplankton growth and the  
575 interaction of light and temperature: A synthesis at the species and community level.  
576 *Limnol Oceanogr* 2016; **61**: 1232–1244.
- 577 69. Choi DH, Noh JH, Shim J. Seasonal changes in picocyanobacterial diversity as revealed  
578 by pyrosequencing in temperate waters of the East China Sea and the East Sea. *Aquat*  
579 *Microb Ecol* 2013; **71**: 75–90.



- 580 70. Feingersch R, Suzuki MT, Shmoish M, Sharon I, Sabehi G, Partensky F, et al. Microbial  
581 community genomics in eastern Mediterranean Sea surface waters. *ISME J* 2010; **4**: 78–  
582 87.
- 583 71. Katsanevakis S, Coll M, Piroddi C, Steenbeek J, Ben Rais Lasram F, Zenetos A, et al.  
584 Invading the Mediterranean Sea: biodiversity patterns shaped by human activities. *Front*  
585 *Mar Sci* 2014; **1**: 32.
- 586 72. Kim Y, Jeon J, Kwak MS, Kim GH, Koh IS, Rho M. Photosynthetic functions of  
587 *Synechococcus* in the ocean microbiomes of diverse salinity and seasons. *PLoS ONE*  
588 2018; **13**: 4–8.
- 589 73. Lipizer M, Partescano E, Rabitti A, Giorgetti A, Crise A. Qualified temperature, salinity  
590 and dissolved oxygen climatologies in a changing Adriatic Sea. *Ocean Sci* 2014; **10**:  
591 771–797.
- 592 74. Xia X, Guo W, Tan S, Liu H. *Synechococcus* assemblages across the salinity gradient in  
593 a salt wedge estuary. *Front Microbiol* 2017; **8**: 1254.
- 594 75. Marsan DW. Adaptive mechanisms of an estuarine *Synechococcus* based on genomics,  
595 transcriptomics, and proteomics. *ProQuest Dissertations and Theses*. 2016. University  
596 of Maryland, College Park.
- 597 76. Moutin T, Thingstad TF, Van Wambeke F, Marie D, Slawyk G, Raimbault P, et al. Does  
598 competition for nanomolar phosphate supply explain the predominance of the  
599 cyanobacterium *Synechococcus*? *Limnol Oceanogr* 2002; **47**: 1562–1567.
- 600 77. Pernice MC, Forn I, Gomes A, Lara E, Alonso-Sáez L, Arrieta JM, et al. Global  
601 abundance of planktonic heterotrophic protists in the deep ocean. *ISME J* 2015; **9**: 782–  
602 792.
- 603 78. Sunagawa S, Coelho LP, Chaffron S, Kultima JR, Labadie K, Salazar G, et al. Structure  
604 and function of the global ocean microbiome. *Science* 2015; **348**: 1261359–1261359.

605

606

## Figure legends

607

608 **Figure 1:** Relative abundance of marine *Synechococcus* clades in OSD stations. Stations are  
609 located at the bottom of barplots of relative abundance. The insert shows a close-up version of  
610 Europe. Station numbers are shown in Supplementary Figure S1. Categories 5.1 and *Syn*  
611 correspond to reads that could not be assigned to a clade but were assigned to the level of  
612 *Synechococcus* SC 5.1 or *Synechococcus* genus, respectively.

613

614 **Figure 2:** Temperature preferenda of eight marine *Synechococcus* strains. Growth rate as a  
615 function of temperature of acclimated growth. Two strains were chosen within each of the four  
616 major clades I, II, III and IV (top to bottom). All cultures were grown at a light intensity of 20  
617  $\mu\text{mol quanta m}^{-2} \text{s}^{-1}$ . Error bars are standard deviation from the mean based on at least 3  
618 replicates ( $n \geq 3$ ).

619

620 **Figure 3:** Clusters of OSD stations based on relative abundance profiles of *Synechococcus*  
621 clades. OSD stations were clustered based on the relative abundance profiles of marine  
622 *Synechococcus* clades using Bray-Curtis distance. The upper panel indicates water temperature.  
623 Categories 5.1 and *Syn* correspond to reads that could not be assigned to a clade but were  
624 assigned to the level of *Synechococcus* SC 5.1 or *Synechococcus* genus, respectively.

625

626 **Figure 4:** Violin plots showing the distribution of temperature and salinity for each cluster of  
627 OSD stations defined in Fig. 3. A. Temperature. B. Salinity. The black dot in each violin plot  
628 shows the median value. Different letters indicate significantly different distributions (Dunn  
629 test, adjusted p-value  $< 0.05$ ). The same analysis considering distance to the nearest coast gave  
630 no significant result.

631

632

## Supplementary information

633

634 **Supplementary Figure S1: Map of OSD stations.** All OSD stations that were analyzed in this  
635 study are indicated by their number. The inset shows a close-up view of Europe.

636

637 **Dataset S1: OSD samples used in this study.** Characteristics and accession numbers of the  
638 OSD samples analyzed in this study and corresponding contextual data, as retrieved from  
639 PANGAEA (<https://doi.pangaea.de/10.1594/PANGAEA.854419>; [50]).

640

641 **Dataset S2: Summary data for the 863 complete genomes of aquatic bacteria used as**  
642 **reference in this study.** Genomes sequences were retrieved either from Cyanorak v2.1  
643 ([www.sb-roscoff.fr/cyanorak](http://www.sb-roscoff.fr/cyanorak)), NCBI Genbank for additional *Synechococcus* whole genomes  
644 and for genomes other than marine *Synechococcus* and *Prochlorococcus* listed in Cyanobase  
645 (<http://genome.microbedb.jp/cyanobase/>), or proGenomes  
646 (<http://progenomes.embl.de/index.cgi>). The table includes subclade designation based on [11].

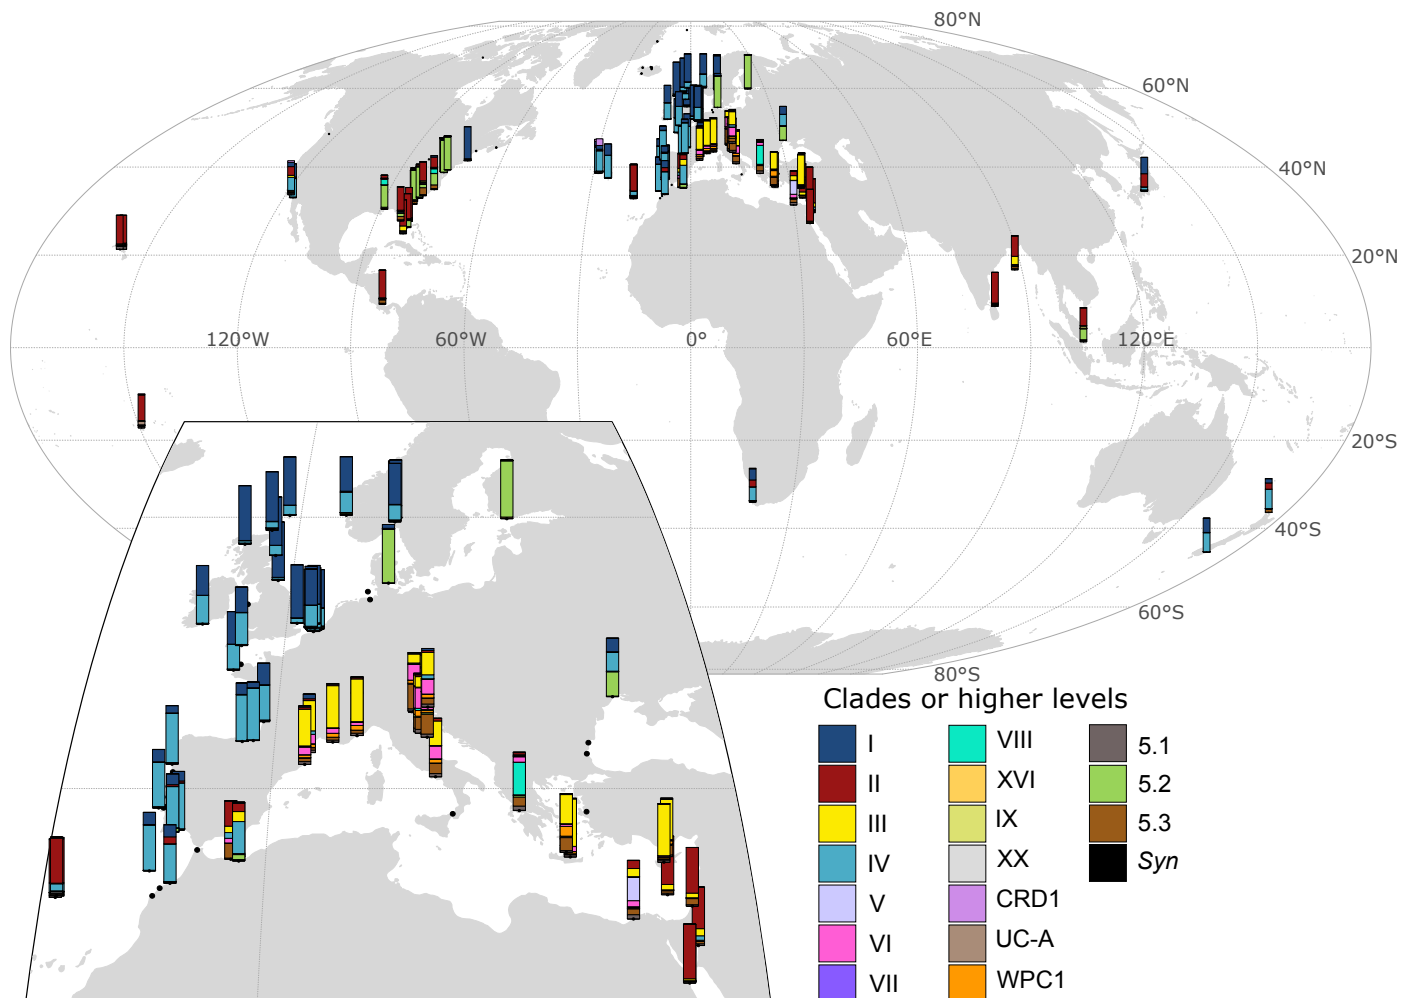

**Doré et al. Figure 1**

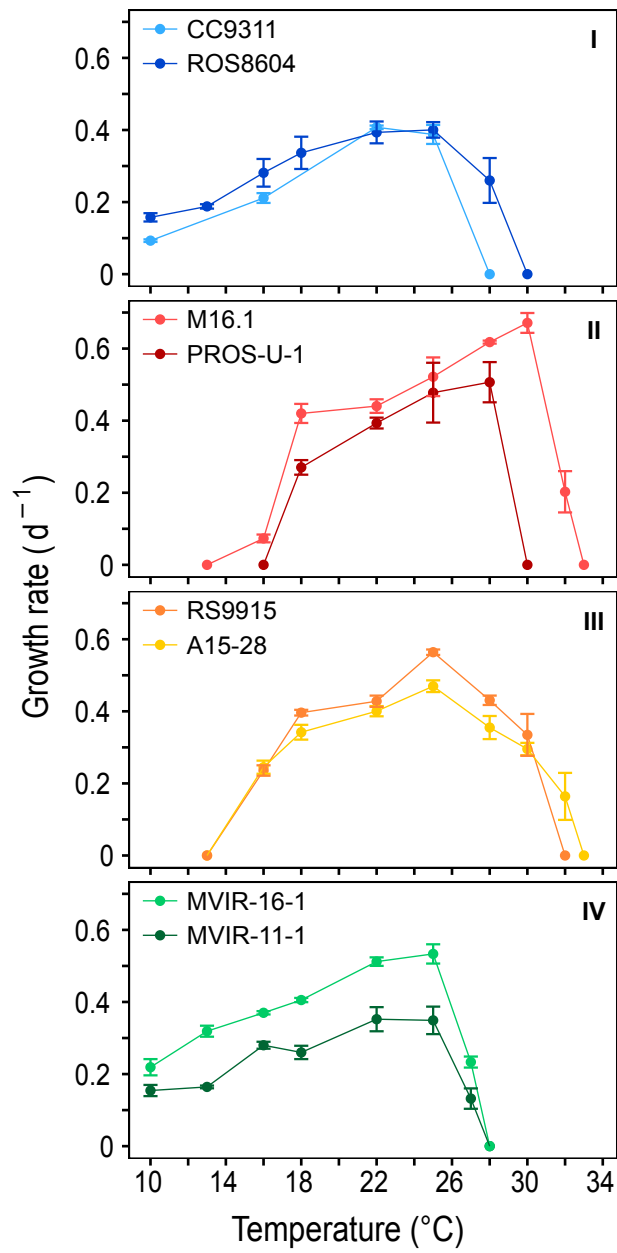

**Doré et al. Figure 2**

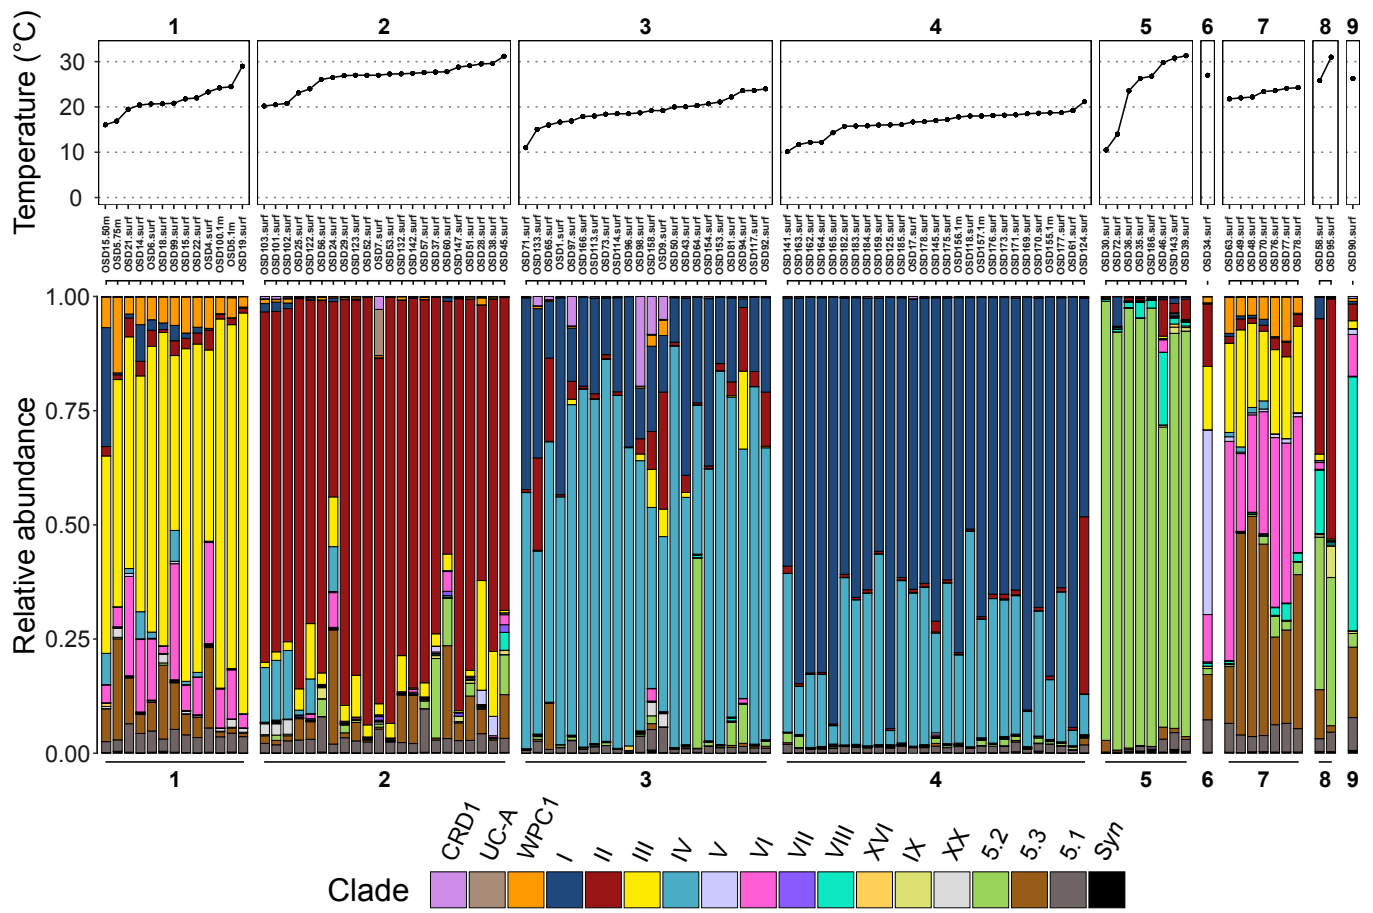

**Doré et al. Figure 3**

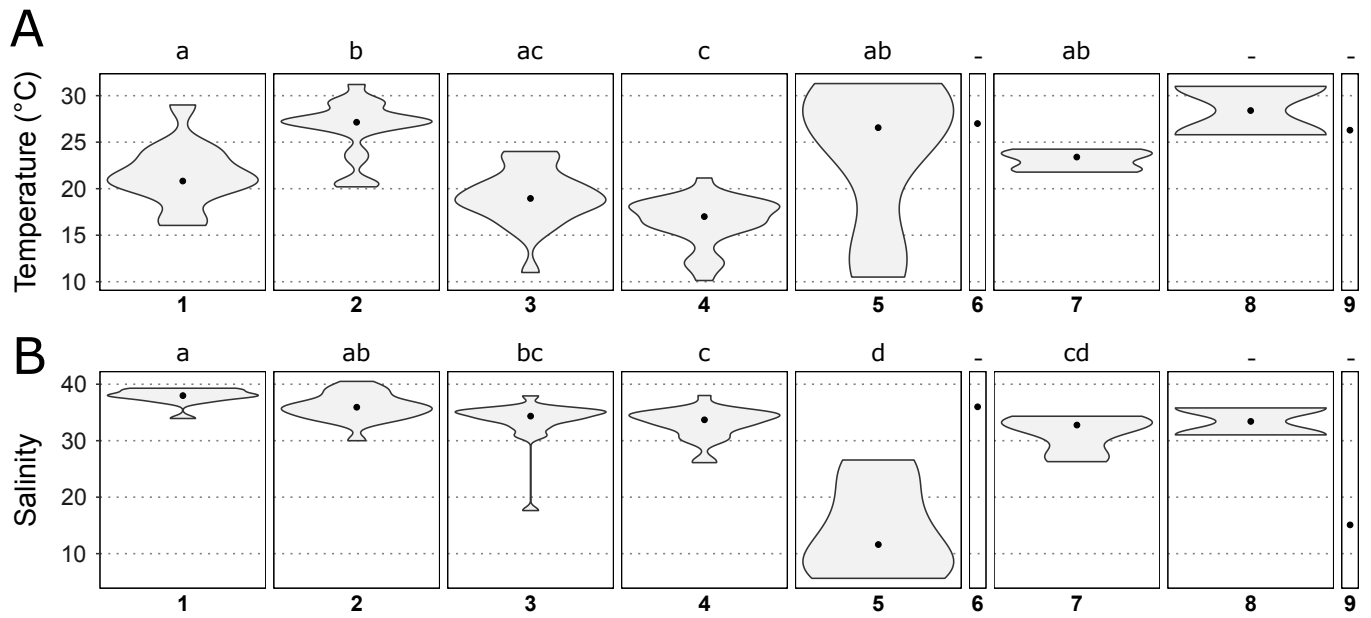

**Doré et al. Figure 4**
